# Supplementary material
Source: MDPI journal article supplement (https://www.mdpi.com/2071-1050/15/5/4452)
Supplement: s1 [file s1]

### Supplementary Material:

Sampling sites from urban districts with large populations are selected to ensure a more representative survey. These surveyed districts have denser communities, and the number of respondents in the survey will vary according to the size of the community. The surveyed participants are all long-term residents, making them representative of the population in the area (Figure S1-3).

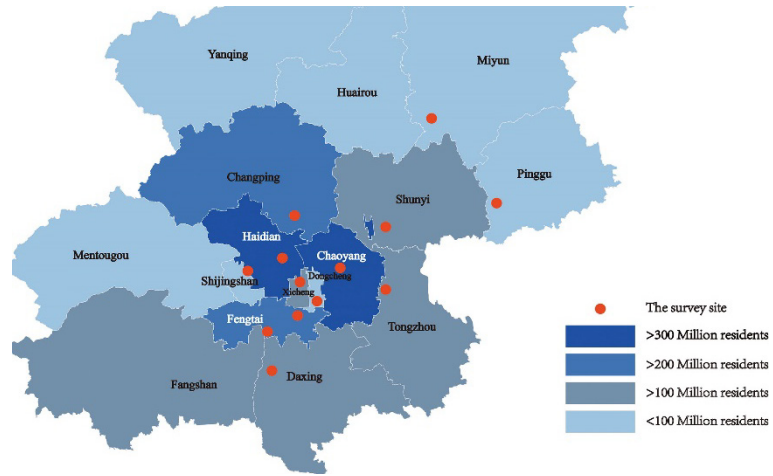

Figure S1. Survey sites in Beijing

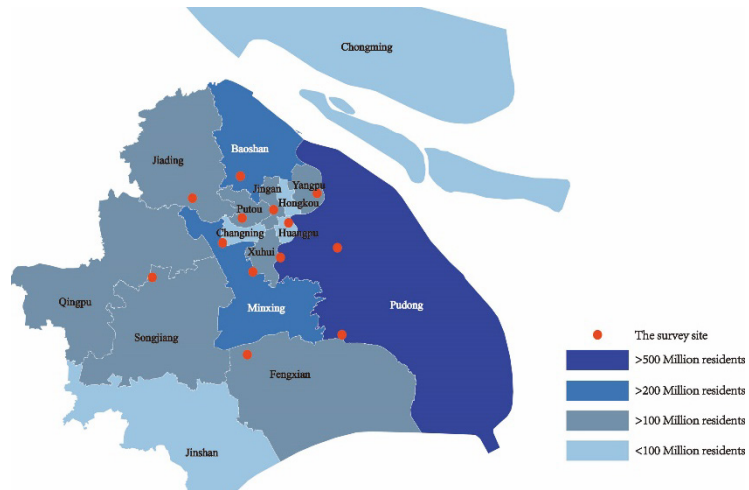

Figure S2. Survey sites in Shanghai

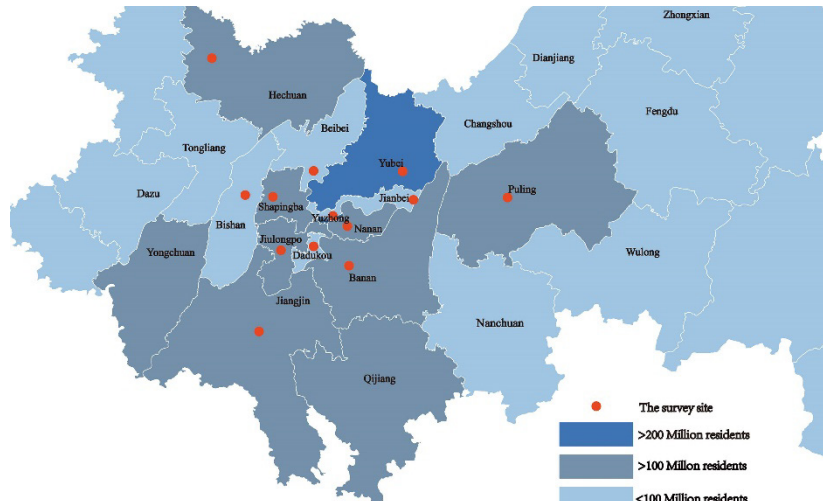

Figure S3. Survey sites in Chongqing
